# Supplementary material for: Effects of Tai Chi combined with transcranial direct current stimulation on pain relief and pain matrix in people with knee osteoarthritis: a randomized controlled neuroimaging trial
Source: Research Square preprint supplement (doi:10.21203/rs.3.rs-6253303/v1), 2025-03-31
Supplement: Supplementary file 1 [file 2c8b1db7876afc1da5ed80cd.docx]

Effects of Tai Chi combined with transcranial direct current stimulation on pain relief and pain matrix in people with knee osteoarthritis: a randomized controlled neuroimaging trial

Xuefeng Liu, Tong Tang, Shengxiang Liang, Jia Huang, Zhizhen Liu, Weilin Liu, Li Huang, Shiqi Zhan, Jing Tao*

**Supplementary Table**

Supplementary Table S1. MNI coordinates of the 17 ROIs within pain matrix

| NO. | ROIs | MNI coordinates | | | radius (mm) |
| --- | --- | --- | --- | --- | --- |
| X | Y | Z |
| 1 | right dorsolateral prefrontal cortex (DLPFC_R) | 16 | 58 | 32 | 6 |
| 2 | left anterior cingulate cortex (ACC_L) | -2 | 18 | 24 | 6 |
| 3 | right anterior cingulate cortex (ACC_R) | 0 | 34 | -6 | 6 |
| 4 | left posterior cingulate cortex (PCC_L) | -6 | -43 | 54 | 6 |
| 5 | right posterior cingulate cortex (PCC_R) | 10 | -20 | 40 | 6 |
| 6 | left supplementary motor area (SMA_L) | -4 | -10 | 68 | 6 |
| 7 | right supplementary motor area (SMA_R) | 14 | -12 | 56 | 6 |
| 8 | left thalamus (Thalamus_L) | -6 | -19 | 12 | 6 |
| 9 | right thalamus (Thalamus_R) | 15 | -16 | 16 | 6 |
| 10 | left insular lobe (Insular_L) | -40 | -16 | 10 | 6 |
| 11 | right insular lobe (Insular_R) | 36 | -20 | 6 | 6 |
| 12 | left primary somatosensory cortex (S1_L) | -50 | -26 | 60 | 6 |
| 13 | right primary somatosensory cortex (S1_R) | 48 | -29 | 61 | 6 |
| 14 | left secondary somatosensory cortex (S2_L) | -38 | -47 | 65 | 6 |
| 15 | right secondary somatosensory cortex (S2_R) | 44 | -30 | 45 | 6 |
| 16 | left precuneus (Precuneus_L) | -4 | -42 | 56 | 6 |
| 17 | left superior frontal gyrus (SFG_L) | -28 | 52 | 0 | 6 |

Supplementary Table S2. Demographics and baseline characteristics of participants by PP analysis

| Characteristic | Tai Chi combined with tDCS group (n=29) | Tai Chi group (n=33) | tDCS group (n=30) | Health education control group (n=29) | *P* value |
| --- | --- | --- | --- | --- | --- |
| Age, y | 64.00 (58.50, 68.50) | 62.00 (55.50, 68.50) | 67.00 (58.00, 73.00) | 67.00 (62.50, 73.00) | 0.060 |
| Gender |  |  |  |  |  |
| Male, n (%) | 11 (37.9%) | 4 (12.1%) | 6 (20.0%) | 9 (31.0%) | 0.090 |
| Female, n (%) | 18 (62.1%) | 29 (87.9%) | 24 (80.0%) | 20 (69.0%) |
| BMI, kg/m2 | 23.00 ± 2.37 | 23.48 ± 2.34 | 23.95 ± 3.46 | 24.47 ± 2.81 | 0.217 |
| Educational duration, y | 12.00 (10.50, 13.00) | 12.00 (8.00, 13.00) | 12.00 (9.00, 15.00) | 12.00 (9.00, 15.00) | 0.692 |
| Most severely affected knee, n (%) |  |  |  |  |  |
| Left knee | 12 (41.4%) | 11 (33.3%) | 15 (50.0%) | 9 (31.0%) | 0.744 |
| Right knee | 14 (48.3%) | 20 (60.6%) | 13 (43.3%) | 17 (58.6%) |
| Same of both knee | 3 (10.3%) | 2 (6.1%) | 2 (6.7%) | 3 (10.3%) |
| KL grade of the most severely affected knee, n (%) |  |  |  |  |  |
| Grade 2 | 19 (65.5%) | 21(63.6%) | 20 (66.7%) | 14 (48.3%) | 0.436 |
| Grade 3 | 10 (34.5%) | 12 (36.4%) | 10 (33.3%) | 15 (51.7%) |
| Duration of knee pain, n (%) |  |  |  |  |  |
| Less than 1 year | 6(20.7%) | 5 (15.2%) | 3 (10.0%) | 5 (17.2%) | 0.647 |
| 1 to 5 years | 8 (27.6%) | 11 (33.3%) | 10 (33.3%) | 7 (24.1%) |
| 5 to 10 years | 6 (20.7%) | 7 (21.2%) | 3 (10.0%) | 9 (31.0%) |
| More than 10 years | 10 (31.0%) | 10 (30.3%) | 14 (46.7%) | 8 (27.6%) |
| MoCA scores | 24.93 ± 2.79 | 24.21 ± 2.40 | 24.90 ± 2.70 | 23.93 ± 3.47 | 0.436 |
| BDI-II scores | 4.00 (2.00, 7.00) | 5.00 (2.50, 7.00) | 3.50 (2.00, 8.00) | 6.00 (3.50, 9.50) | 0.341 |
| NSAID use before study, n (%)a | 0 (0.0%) | 0 (0.0%) | 1 (3.3%) | 1 (3.4%) | 0.544 |
| Analgesic use before study, n (%) a | 0 (0.0%) | 2 (6.1%) | 0 (0.0%) | 0 (0.0%) | 0.143 |
| WOMAC pain subscore | 9.48 ± 3.80 | 12.58 ± 8.28 | 13.03 ± 9.25 | 10.62 ± 7.14 | 0.220 |
| WOMAC stiffness subscore | 2.28 ± 2.33 | 3.85 ± 4.05 | 4.00 ± 4.03 | 2.72 ± 3.54 | 0.177 |
| WOMAC physical function subscore | 24.24 ± 19.24 | 35.88 ± 28.48 | 40.17 ± 28.92 | 29.97 ± 26.82 | 0.107 |

Notes: BMI = body mass index; KL grade = Kellgren-Lawrence grade; MoCA = Montreal cognitive assessment scale; BDI-II = Beck Depression Inventory-Second edition; NSAIDs = nonsteroidal anti-inflammatory drugs; WOMAC = Western Ontario and McMaster Universities Osteoarthritis Index.

a means within 6 months before enrollment.

Supplementary Table S3. Intervention attendance rates by ITT and PP analyses

| Characteristic | Tai Chi combined with tDCS group | Tai Chi group | tDCS group | *P* value |
| --- | --- | --- | --- | --- |
| ITT analysis of attendance rate | n=38 | n=38 | n=38 |  |
| Participation by attendance rate, n (%) |  |  |  |  |
| 70% - 100% | 28 (73.7%) | 28 (73.7%) | 24 (63.2%) | 0.837 |
| 50% - 69% | 4 (10.5%) | 5 (13.2%) | 7 (18.4%) |
| 1% - 49% | 3 (7.9%) | 4 (10.5%) | 5 (13.2%) |
| 0% | 3 (7.9%) | 1 (2.6%) | 2 (5.3%) |
| PP analysis of attendance rate | n=29 | n=33 | n=30 |  |
| Participation by attendance rate, n |  |  |  |  |
| 70% - 100% | 23 (79.3%) | 26 (78.8%) | 21 (70.0%) | 0.885 |
| 50% - 69% | 4 (13.8%) | 5 (15.2%) | 7 (23.3%) |
| 1% - 49% | 2 (6.9%) | 2 (6.1%) | 2 (6.7%) |

Note: ITT = Intention-to-treat; PP = per-protocol
